# Supplementary material
Source: publisher figshare collection journal article supplement (https://acs.figshare.com/ndownloader/files/3837160)
Supplement: Supplementary file 1 [file 3837160]

## Supporting information

### Thioflavin T as an Efficient G-quadruplex Inducer for highly sensitive detection of thrombin using a new FRET system

Xingfen Liu,<sup>\*,†,▽</sup> Xiaoxiao Hua,<sup>†,▽</sup> Quli Fan,<sup>†</sup> Jie Chao,<sup>†</sup> Shao Su,<sup>†</sup> Yanqin Huang,<sup>†</sup> Lianhui Wang,<sup>†</sup> Wei Huang<sup>\*,†,‡</sup>

<sup>†</sup> Key Laboratory for Organic Electronics & Information Displays and Institute of Advanced Materials, Jiangsu National Synergetic Innovation Center for Advanced Materials, Nanjing University of Posts and Telecommunications, Nanjing 210023, China

<sup>‡</sup> Key Laboratory of Flexible Electronics & Institute of Advanced Materials, Jiangsu National Synergetic Innovation Center for Advanced Materials, Nanjing Tech University (Nanjing Tech), Nanjing 211816, China

\*E-mail: [iamxfliu@njupt.edu.cn](mailto:iamxfliu@njupt.edu.cn); [wei-huang@njtech.edu.cn](mailto:wei-huang@njtech.edu.cn).

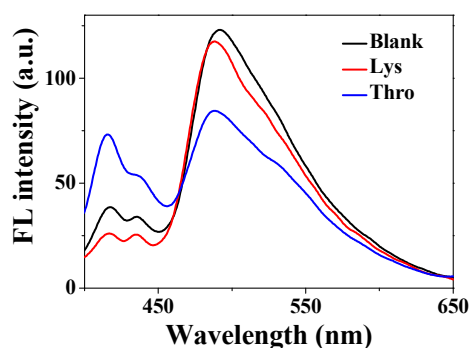

**Figure S1.** Fluorescence spectra of thrombin and lysozyme detection based on the FRET between ThNI and ThT.

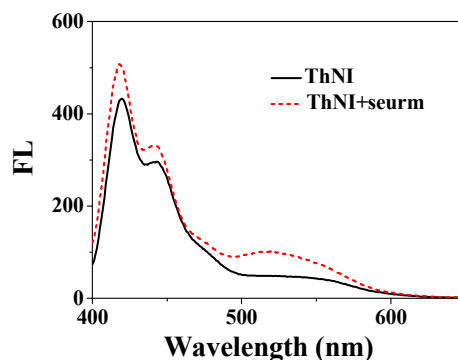

**Figure S2.** Fluorescence response of ThNI to 10-fold diluted serum.

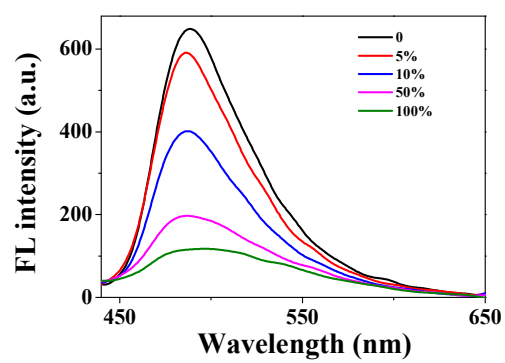

**Figure S3.** Fluorescence response of ThT to the serum at different concentrations.
